# Supplementary material
Source: HighWire-hosted journal article supplement (https://gocm.bmj.com/content/3/1/60)
Supplement: inline-supplementary-material-1 [file inline-supplementary-material-1.docx]

QUESTIONNAIRE

**APPENDIX 1:**

**Section A: Socio-demographic factors**

1. What is your Age? ………..
2. What is your marital status:

1) Single 2) Married 3) Divorced

1. Gender

1) Female 2) Male

1. Education level

1) Primary school 2) Secondary school 3) None

1. What is your residency status

1) Of street 2) On street

1. If of Street, where do you go back to after the day’s activity

1) Welfare homes 2) Parent/guardian home 3) Bases 4) Rented house

1. How long have you been on the street?

1) Two months 2) 1 year 3) more than 1 year.

**Section B: Health seeking behaviour**

1. Have you heard of RTIs?

1) Yes 2) No

1. If yes, where did you hear it from?

1) Newspapers and magazine 2) Radio &TV 3) By health promotion educators

4) By Friends, colleague and family members 5) others specify…….

1. Have you experienced any reproductive tract illness?

1)yes 2) No…if No, go to question 16

1. Have you attempted to treat your illness? 1)Yes 2) No
2. How many days after the onset of disease symptoms did you get care from a provider? 1)The same day 2) the next day 3) More than one day later 4) Never
3. At what stage of your disease have you gone to a provider?

1)In early stages and onset of symptoms 2) When symptoms were very evident 3) In serious stage of disease

1. Where did you go to treatment in the first step?

1) Hospital/ health facility 2) Pharmacy 3) Traditional healers 4) I have not referred to any of the above and self-treatment

1. Until what step of treatment have you completed your course of treatment according to provider opinion?

1)To recover 2) to relieve the symptoms 3) do not complete my course of treatment

**Section C: Health facility factors**

1. Are you able to access health care services in health care facilities? 1)Yes 2) No
2. Have you ever had experience of care reception from the health care centers? (Clinic, emergency room, doctor’s office, hospital, health centers) 1) Yes 2) No.
3. Was the usage of health services for the treatment of your disease useful in your opinion? 1)Yes 2) No
4. How satisfied are you with the behavior and accountability of health service providers? 1) Very much 2) Much 3) Somewhat 4) Low 5) Very low
5. How much maintained is your dignity and respect, as receiving care from health care providers? 1) Very much 2) Much 3) Somewhat 4) Low 5) Very low
6. Have you received your needed care at the right time, when you visited to health care centers? 1) Always 2) Most of the time 3) Sometimes 4) Rarely
7. How important are the behaviors of health care providers in your assessment of the services that you received?

1) Very much 2) Much 3) Somewhat 4) Low 5) Very low

1. How important are Physical environment of care providers’ centers, their Attractiveness and convenience in your assessment of the services that you received?

1) Very much 2) Much 3) Somewhat 4) Low 5) Very low.

1. Are you able to afford your needed health care? 1) yes 2) No
2. What is the distance of the nearest health facility? ................

**Section D: Risky Sexual practices**

1. Do you use alcohol/drugs? 1)Yes 2) No
2. What was your age when you had your first sexual intercourse? ..........
3. How Many sexual partners do you have? 1) One 2) two 3) More than two
4. During sexual intercourse does your sexual partner use a condom?? 1)Yes 2) No
5. If yes, how often? 1) Every time 2) Almost every time 3) Never
6. If no, why?

1) Partner dislikes the condom 2) lack of availability 3) Lack of affordability 5) Trust 6) Others ………………………
